# Supplementary material for: Management of deep vein thrombosis and prevention of post-thrombotic syndrome
Source: HighWire-hosted journal article supplement (doi:10.1136/bmj.d5916), 2011-10-31
Supplement: strr822775.w2_default.pdf [file strr822775.w2_default.pdf]

## VISUAL GUIDE FOR THE ASSESSMENT OF POST-THROMBOTIC SYNDROME

| No or Minimal                                                                                                                                                   | Mild                                                                                                                                                                      | Moderate                                                                                                                                                                                    | Severe                                                                                                                                                                                                   |
|-----------------------------------------------------------------------------------------------------------------------------------------------------------------|---------------------------------------------------------------------------------------------------------------------------------------------------------------------------|---------------------------------------------------------------------------------------------------------------------------------------------------------------------------------------------|----------------------------------------------------------------------------------------------------------------------------------------------------------------------------------------------------------|
| <b>Edema</b>                                                                                                                                                    |                                                                                                                                                                           |                                                                                                                                                                                             |                                                                                                                                                                                                          |
|  <p>No loss of bony landmarks; no pitting with pressure over ankle or shin</p> |  <p>Minimal loss of bony landmarks; shallow pitting with pressure over ankle or shin</p> |  <p>Noticeable swelling and loss of bony landmarks; moderate pitting with pressure over ankle or shin</p> |  <p>Severe swelling and loss of bony landmarks; deep pitting with pressure over ankle, shin or knee</p>               |
| <b>Hyperpigmentation</b>                                                                                                                                        |                                                                                                                                                                           |                                                                                                                                                                                             |                                                                                                                                                                                                          |
|  <p>None</p>                                                                   |  <p>Faint, speckled brownish discoloration around ankle</p>                              |  <p>Obvious brownish discoloration around ankle and lower shin</p>                                        |  <p>Patches of dark, confluent, brownish discoloration around ankle and shin</p>                                      |
| <b>Venous ectasia</b>                                                                                                                                           |                                                                                                                                                                           |                                                                                                                                                                                             |                                                                                                                                                                                                          |
|  <p>No venules or varicose veins</p>                                          |  <p>A few faint reddish or purplish venules around the ankle or foot area</p>           |  <p>Prominent purplish venules around the ankle and foot area</p>                                        |  <p>Numerous confluent and prominent purple venules or varicose veins around the ankle, shin or elsewhere on leg</p> |
| <b>Redness</b>                                                                                                                                                  |                                                                                                                                                                           |                                                                                                                                                                                             |                                                                                                                                                                                                          |
|  <p>Normal color of leg</p>                                                  |  <p>Faint redness of foot or lower leg</p>                                             |  <p>Moderate redness of foot or lower leg</p>                                                           |  <p>Pronounced redness or purplish color of foot and lower leg</p>                                                  |
| <b>Skin induration</b>                                                                                                                                          |                                                                                                                                                                           |                                                                                                                                                                                             |                                                                                                                                                                                                          |
| <p>Skin of shin and ankle not thickened and freely mobile over underlying tissue or bony structures</p>                                                         | <p>Skin of shin or ankle slightly thickened or slightly adherent to underlying tissue or bony structures</p>                                                              | <p>Skin of shin or ankle moderately thickened or moderately adherent to underlying tissue or bony structures</p>                                                                            | <p>Skin of shin and ankle very thickened or tightly adherent to underlying tissue or bony structures</p>                                                                                                 |
| <b>Pain during calf compression</b>                                                                                                                             |                                                                                                                                                                           |                                                                                                                                                                                             |                                                                                                                                                                                                          |
| <p>None</p>                                                                                                                                                     | <p>Present; patient says pain is mild in intensity</p>                                                                                                                    | <p>Present; patient says pain is moderate in intensity</p>                                                                                                                                  | <p>Present; patient says pain is severe in intensity</p>                                                                                                                                                 |
| <b>Ulcer</b>                                                                                                                                                    |                                                                                                                                                                           |                                                                                                                                                                                             |                                                                                                                                                                                                          |
| <p>Scored as present (i.e. any ulcer) or absent.</p> <p>Ulcer is typically located on medial aspect of lower leg and may be open or healed</p>                  |                                                                                                                                                                           |                                                                                                          |                                                                                                                                                                                                          |
| <p><b>Note</b></p> <p>Signs may be less apparent in patients with brown or black skin.</p>                                                                      |                                                                                                                                                                           |                                                                                                                                                                                             |                                                                                                                                                                                                          |
| <p>Developed for the SOX Trial by Dr. Susan Kahn, Tatiana Vydykhan and Anthony Vrakotas 2003.<br/>Adapted from Villalta et al, Haemostasis 1994.</p>            |                                                                                                                                                                           |                                                                                                                                                                                             |                                                                                                                                                                                                          |

scale.
